# Supplementary material for: Topologically associating domains are ancient features that coincide with Metazoan clusters of extreme noncoding conservation
Source: PubMed Central journal article supplement (PMC5585340; doi:10.1038/s41467-017-00524-5), 2017-09-05
Supplement: 41467_2017_524_MOESM1_ESM.pdf [file 41467_2017_524_MOESM1_ESM.pdf]

## **Description of Supplementary Files**

File Name: Supplementary Information

Description: Supplementary Figures, Supplementary Tables, Supplementary Methods and Supplementary References

File Name: Supplementary Data 1

Description: GRB predictions generated using comparisons of hg19-galGal4 (70%/50bp).

File Name: Supplementary Data 2

Description: GRB predictions generating using comparisons and dm3-droMoj3 (96%/50bp).

File Name: Peer Review File

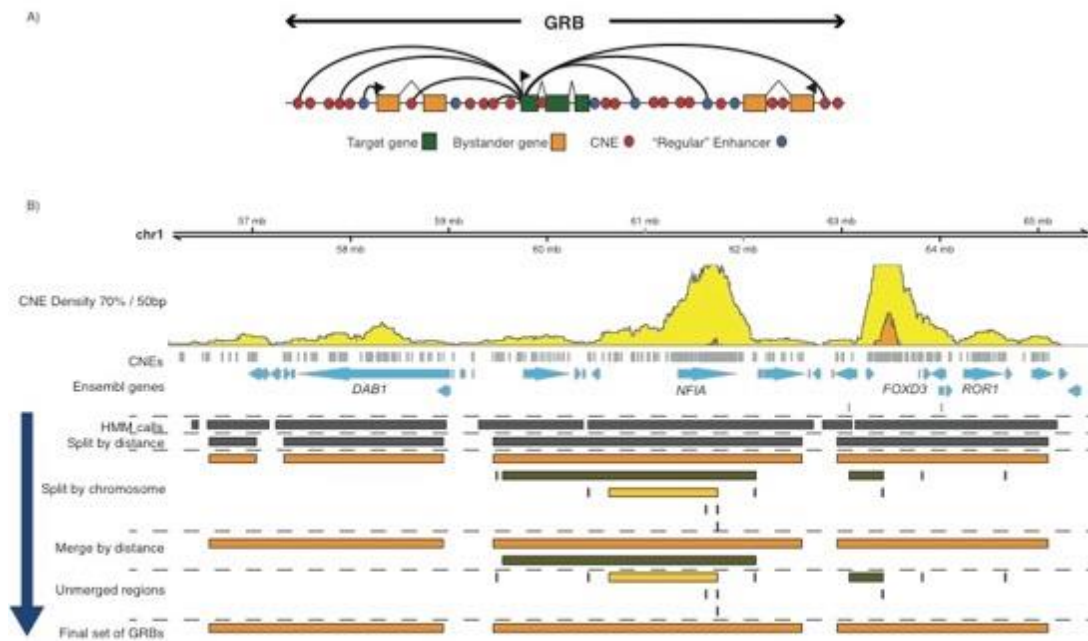

**Supplementary Figure 1: Description of GRB model and schematic of the method for segmenting the genome into GRBs.** A) Developmental genes are often found surrounded by arrays of conserved noncoding elements (CNEs), many of which act as long-range regulatory elements of this gene. In addition to this trans-dev gene under long-range regulation, a GRB can contain other genes known as bystander genes, which are not under this type of long-range regulation but contain CNEs within their introns which regulate the target gene of the GRB. The requirement to keep developmental regulators in *cis* with their regulatory elements results in the maintenance of synteny between CNEs, target genes and bystander genes over large evolutionary distances<sup>1,2</sup>. Bystander genes and target genes can also be under the regulation of other elements within the region that are not under such high levels of conservation. B) The region chr1:56136940-65569360 contains several distinct regions of CNE density overlapping with known developmental regulators (*DAB1*, *NFIA*, *FOXD3*). Our CNE clustering method (see Methods) splits the CNE density obtained from ANCOR into distinct regions by first segmenting the density using a HMM into regions of high and low density, and then clustering the CNEs together using the distance between them. This is followed by the application of various heuristics to generate a set of putative GRBs. These regions are split by the chromosome that they originate from in the query species, and merged with nearby regions if they are from the same chromosome and within a specified distance. While we expect a number of GRBs to be incorrectly segmented, the resulting set of GRBs appear to match, via visual inspection, the known GRB architecture at a number of loci.

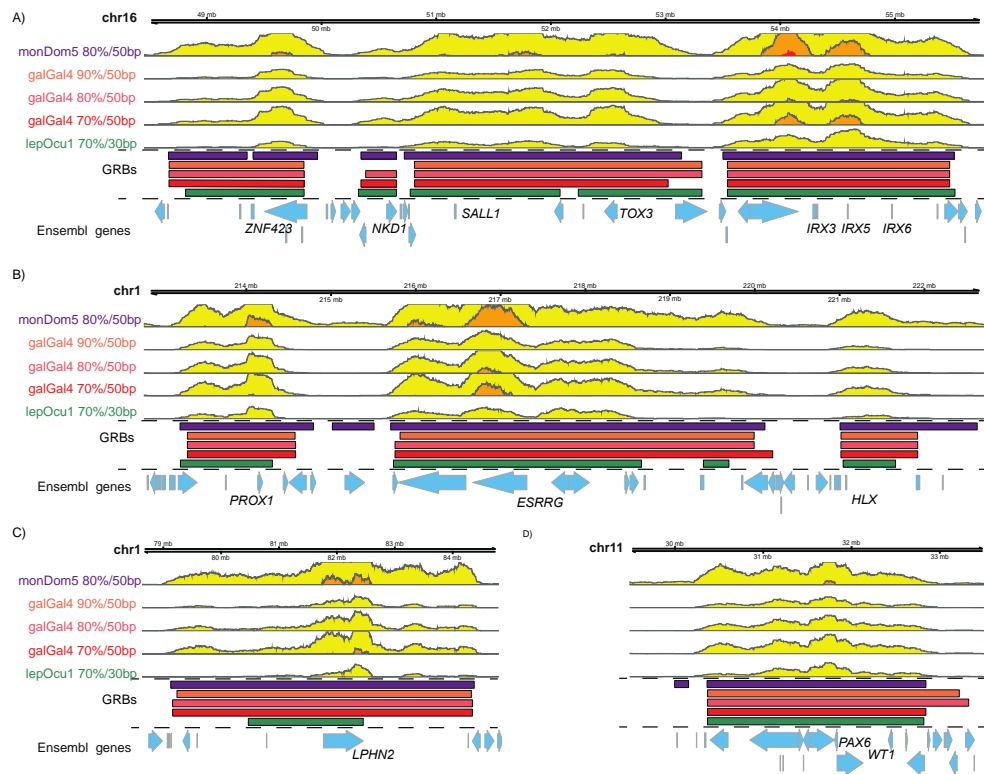

**Supplementary Figure 2: The boundaries of GRBs are highly consistent regardless of thresholds or species.** A number of loci in human are enriched for CNEs identifiable between evolutionarily distant species at various thresholds. For each set of CNEs, the corresponding CNE density is displayed as a horizon plot along with the corresponding set of putative GRBs for each comparison. A) A large chromosomal region in human (chr16: 48476700-55776880) contains several GRBs which are highly conserved over multiple evolutionary comparisons. The edges of the predicted *IRX3/5/6* GRB are highly concordant between all species and thresholds investigated, with the other GRBs in this region showing strong agreement in the majority of cases. The putative GRB identified, using comparisons with opossum and chicken, containing *TOX3* and *SALL1* is known to correspond to two distinct GRBs<sup>3,4</sup>, however we are not able to separate them based using our clustering approach. B) A region (chr1:212820540-222701560) containing three known developmental regulators (*PROX1*, *ESRRG* and *HLX*) is segmented into three GRBs. In the majority of cases at this region at least one boundary of a GRB appears to be identified consistently over all comparisons. C) The GRB (chr1: 78652340-84766720) around *LPHN2*, a latrophilin involved in cell adhesion, has similar boundaries in comparisons generated using monDom5 and galGal4 whilst the GRB identified using lepOcu1 is much smaller. D) While it is known that the region (chr11:29500000-33500000) containing *PAX6* and *WT1* forms two separate GRBs<sup>5</sup>, we are unable to distinguish between these regions based on CNE density alone. One edge of this GRB appears to be robustly identifiable in all comparisons with the other edge exhibiting some variation.

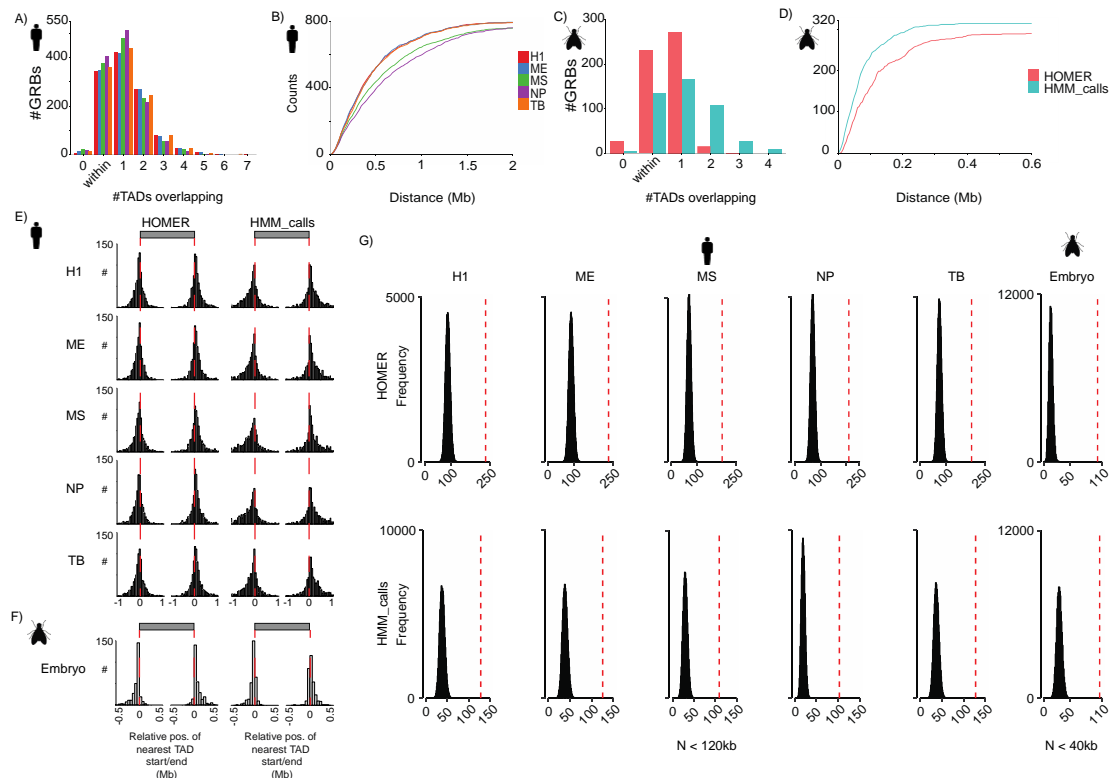

**Supplementary Figure 3: The boundaries of GRBs predict the boundaries of TADs identified in multiple cell lineages**

A) A large number of hg19-galGal4 GRBs was found to be located within individual TADs (identified using HMM\_calls) or overlapping only a single TAD, regardless of cell lineage. B) Cumulative distribution of distance to nearest TAD (HMM\_calls) boundaries from GRB boundaries in different cell lineages considering both edges i.e. both the start and end position of a GRB lie within Xkb of the nearest TAD start and end. C). A large number of dm3-droMoj3 GRBs was found to be located within individual TADs (identified using HOMER and HMM\_calls) or overlapping only a single TAD. D) Cumulative distribution of distance to nearest TAD (HOMER and HMM\_calls) boundaries from GRB boundaries in *Drosophila* whole embryos considering both edges, i.e. both the start and end position of a GRB lie within Xkb of the nearest TAD start and end. E) Relative position of the nearest TAD start/end compared to the boundaries of hg19-galGal4 GRBs, using TADs identified in multiple cell lineages (H1-ESC (H1), mesenchymal stem cells (MS), mesendoderm (ME), neural progenitor cells (NP) and trophoblast-like (TB)). F) Relative position of the nearest TAD start/end compared to the boundaries of dm3-droMoj3 GRB, using TADs identified in *Drosophila* Hi-C data. G) Null distributions of number of GRBs with both edges lying within 120kb (for human centric) or 40kb (for *Drosophila* centric) across all cell lines and methods investigated (see Methods). Number of observed GRBs show as a red dotted line (see Supplementary Table 3). Given the null distribution the correspondence of our set of putative GRBs with TAD boundaries at these distances was significant across all comparisons ( $p < 1e-5$ ).

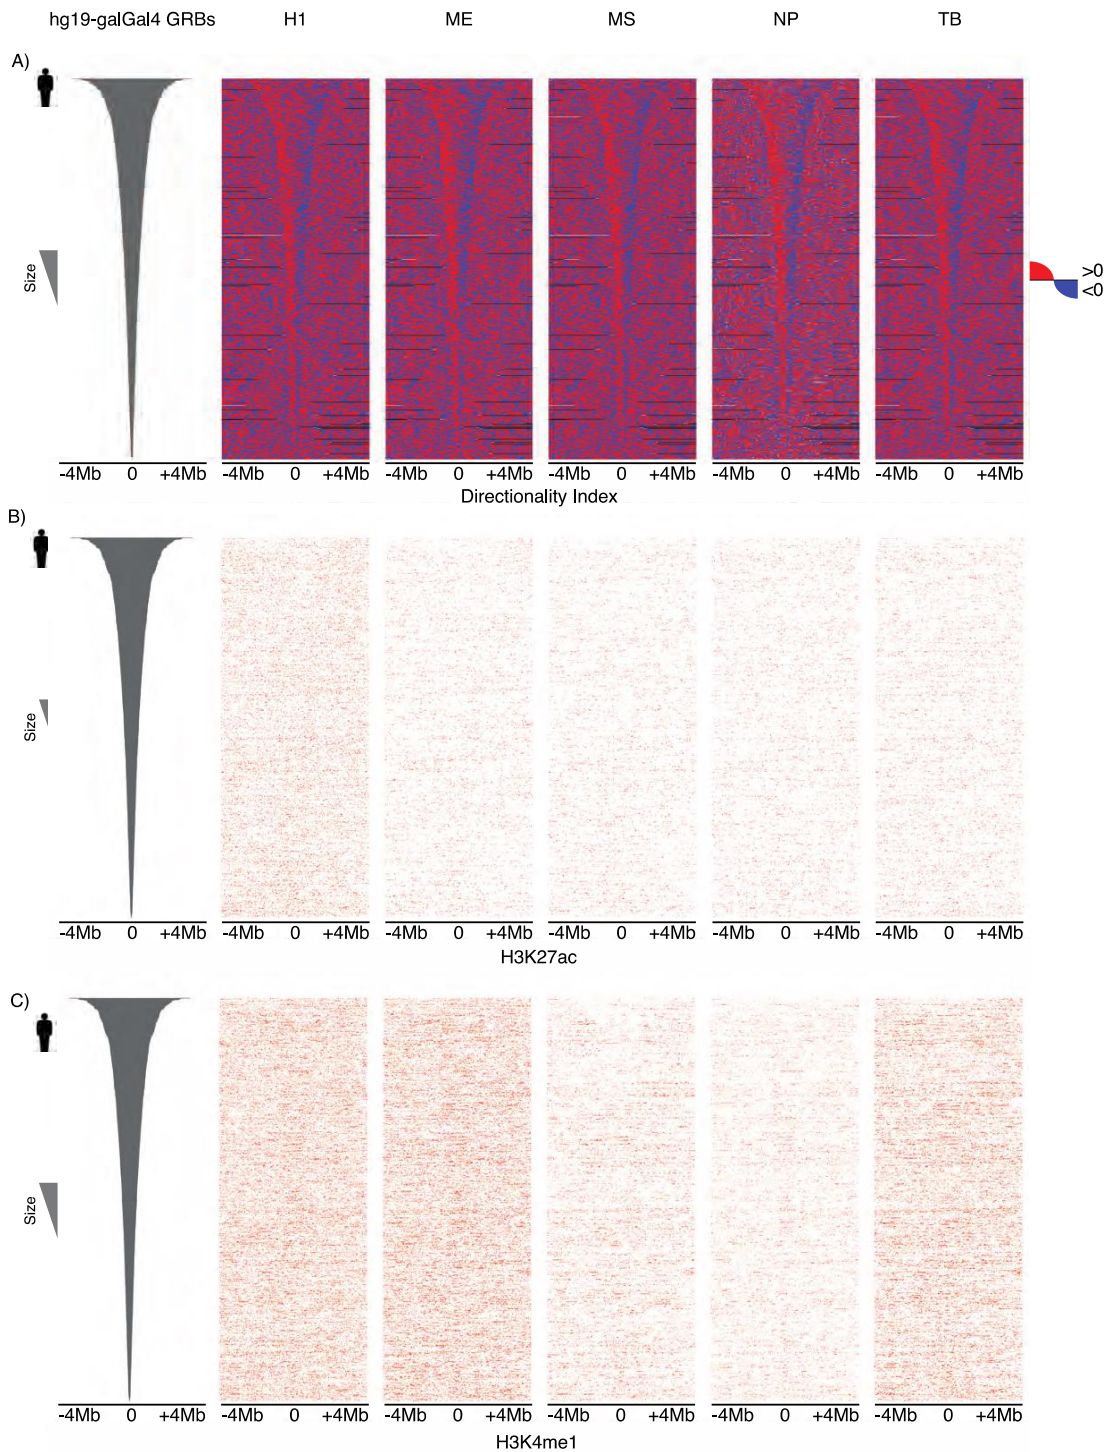

**Supplementary Figure 4: Boundaries of GRBs predict topological organisation, whereas histone modification data is not predictive.** A) Heatmaps representing overall direction of the Hi-C directionality index calculated in different cell lineages, spanning an 8Mb window around the centre of putative hg19-galGal4 GRBs. B) Location of H3K27ac peaks and C) H3K4me1 peaks in an 8Mb window around the centre of hg19-galGal4 GRBs reveals no obvious association between these marks and the boundaries of these regions.

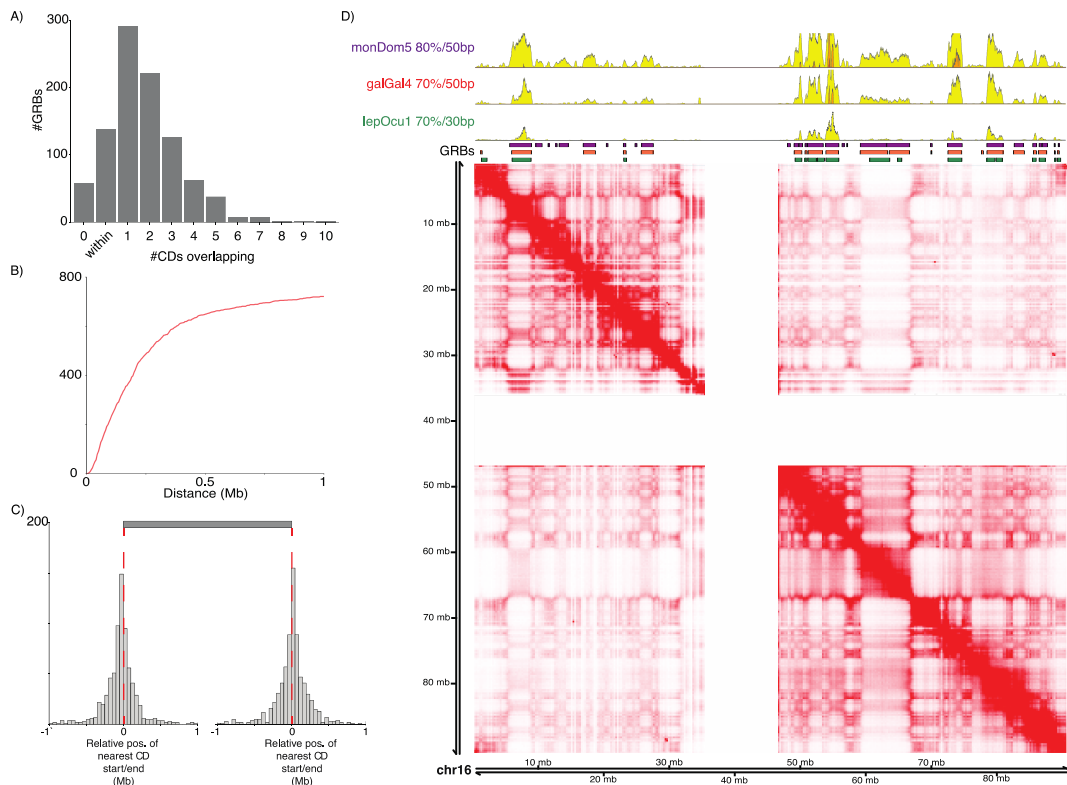

**Supplementary Figure 5: The correspondence between CNE density and topological organization is present in high-resolution Hi-C.** A) Comparison of hg19-galGal4 GRBs with a set of outermost contact domains (CD) identified in Rao *et al.* identified that a large number of GRBs were located within a CD or overlapping a single CD. The large number of GRBs which are not located within a contact domain, is potentially due to the high false negative rate of the arrowhead domain finding algorithm. B) Cumulative distribution of the distance to nearest CD boundaries from GRB boundaries in GM12878 i.e. both the start and end position of a GRB lie within X kb of the nearest CD start and end. C) Relative position of the nearest CD start/end compared to the boundaries of hg19-galGal4 GRBs. D) In kilobase resolution Hi-C of GM12878 cells, the topological organization of human chromosome 16 is highly concordant with the distribution of CNEs identified using opossum, chicken and spotted gar.

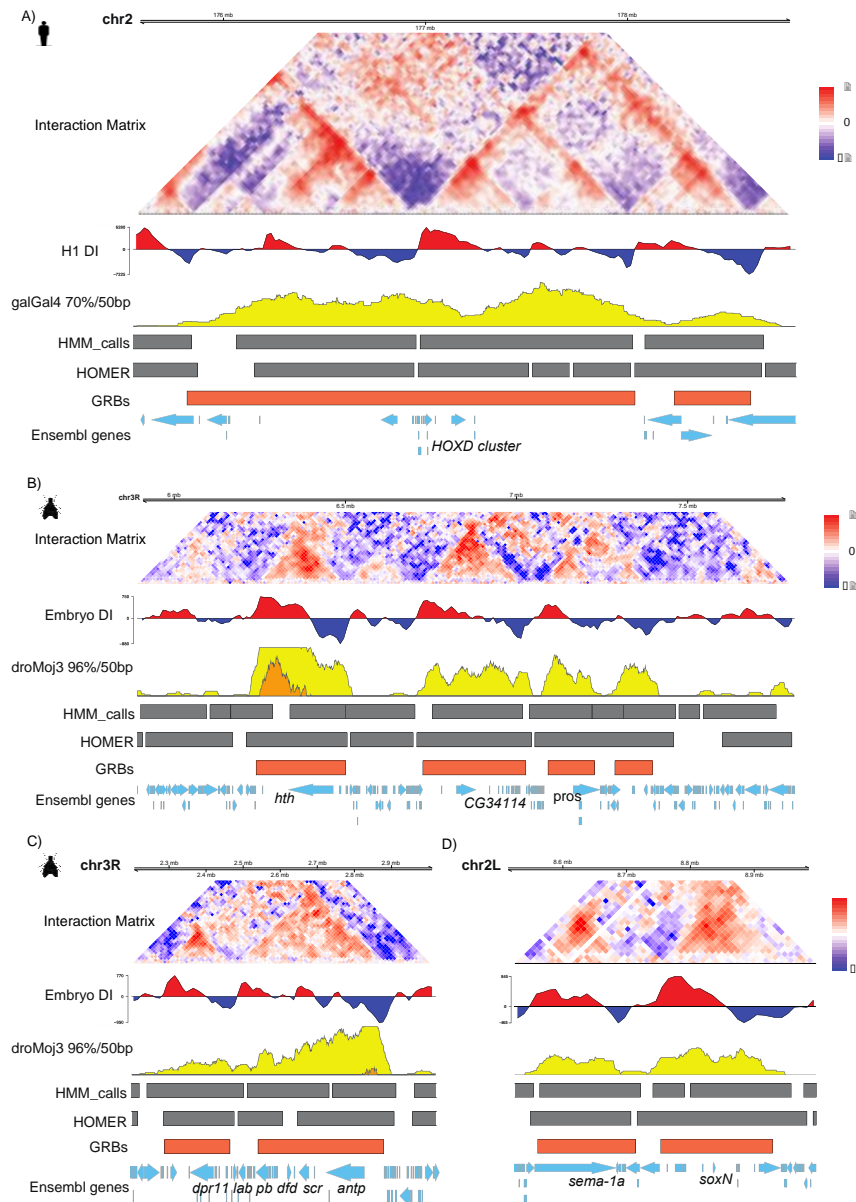

**Supplementary Figure 6: Examples of genomic regulatory blocks and their associated interaction landscapes in human and *Drosophila*.** GRBs at loci in both human and *Drosophila* show strong concordance with the structure of regulatory domains proposed from Hi-C. TADs, generated using both HOMER and HMM\_calls, along with associated directionality index and normalised interaction matrix show a striking concordance with the boundaries of putative GRBs and with CNE density in general. A) The *HoxD* locus in human (chr2:175575640-178817020) is situated between two TADs, with its constituent genes showing interactions with regulatory elements in surrounding TADs depending on the developmental context<sup>6-9</sup>. The proposed *HoxD* GRB recapitulates the span of known regulatory interactions better than the regulatory domains predicted by Hi-C. B) In *Drosophila*, a region spanning (chr3R:5900280-7793200) contains *hth*, *CG34114* and *pros*, all of which have important roles in development. C) The *Drosophila* Antennapedia complex (chr3R:2198960-3016900) is one of two clusters of Hox genes in fly and contains genes necessary for the proper development of the *Drosophila* body plan. D) A region (chr2L:8510000-8990000) contains two GRBs containing the transcription factor *soxN* and the secreted transmembrane protein *sema-1a*. *soxN* is the *Drosophila* homolog of the *Sox1/2/3* transcription factors and is required for the generation of neural progenitors during development, while *sema-1a* is a neuronally expressed protein involved in regulating the localisation of axons during neurogenesis. There are a number of TADs which contain a

developmental TF but are not surrounded by a gene desert - instead, most of the GRB is spanned by target and bystander genes, with most CNEs contained in their introns. As an example, *ISL2* is a LIM homeobox located in a TAD (human chr15:76470001-77230000) which is largely covered by genes, including a long, ubiquitously expressed gene with large and numerous introns (*SCAPER*). A number of CNEs are located within these introns and microsyntenic relationship between these *ISL2* and *SCAPER* is conserved over large evolutionary distances<sup>10</sup>.



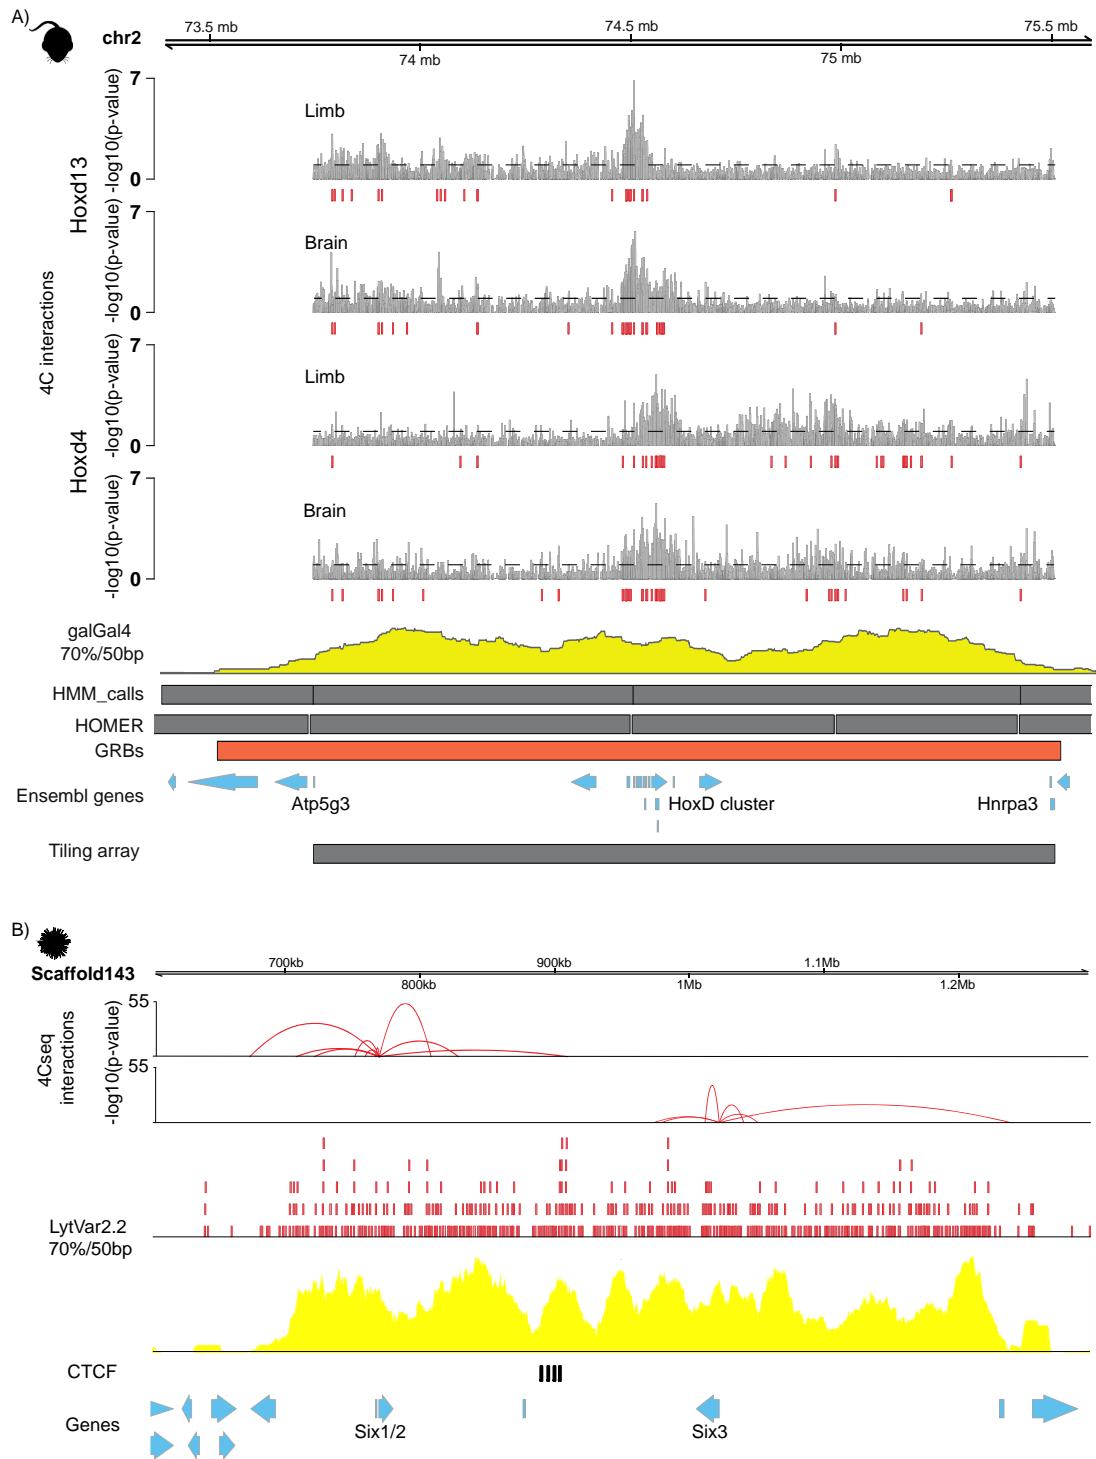

**Supplementary Figure 7: The distribution of CNEs correlates with the extent of interactions at the mouse *HoxD* locus and sea urchin *Six* locus.** A) The *HoxD* locus in mouse (chr2:73381800-75607400) shows the same organisation as in human, with the *HoxD* locus lying in the middle of two TADs, with the distribution of CNEs appearing to be highly concordant with the span of these TADs. Investigating 4C data baited at *Hoxd13* and *Hoxd4* in mouse embryonic forebrain and developing limb illustrates how *Hoxd13* and *Hoxd4* preferentially interact with either the centromeric TAD or telomeric TAD. The large syntenic

region surrounding the *HoxD* locus has previously been identified to contain large numbers of CNEs<sup>11</sup>. The locations of CNEs involved in significant interactions with either *Hoxd13* or *Hoxd4* are shown in red. In the developing limb *Hoxd13* interacts with 28 and 11 CNEs located with the centromeric and telomeric TADs respectively, whereas in embryonic forebrain *Hoxd13* interacts with 26 CNEs located in the centromeric TAD and 15 CNEs located within the telomeric TAD. In the developing limb *Hoxd4* interacts with 7 CNEs located within the centromeric TAD and 39 CNEs within the telomeric TAD, whereas in embryonic forebrain *Hoxd4* interacts with 23 and 35 CNEs located with the centromeric and telomeric TADs respectively. Intriguingly, CNEs are involved in interactions with the HoxD cluster in embryonic forebrain where HoxD genes are not expressed; this suggests that CNEs can be found in close proximity to their target promoter regardless of transcriptional state<sup>12</sup>, or that CNEs are involved in their repression. This highlights the extensive roles CNEs play in the regulation of members of the HoxD cluster. B) The distribution of CNEs, identified in comparisons with *Lytechinus variegatus* (LytVar2.2), at the Six1/4/6 locus (Scaffold143:600000-1300000) in *S. purpuratus* correlates with the span of interactions identified in 4Cseq<sup>13,14</sup>. While it is not possible to demarcate the boundary of the regulatory domains of Six1/2 and Six3, there does appear to be local minima in CNE density close to the domain boundary defined by binding of CTCF. Data obtained from Gomez-Marin *et al.* (GSE66900). Interaction tracks visualised using GenomicInteractions<sup>15</sup>.

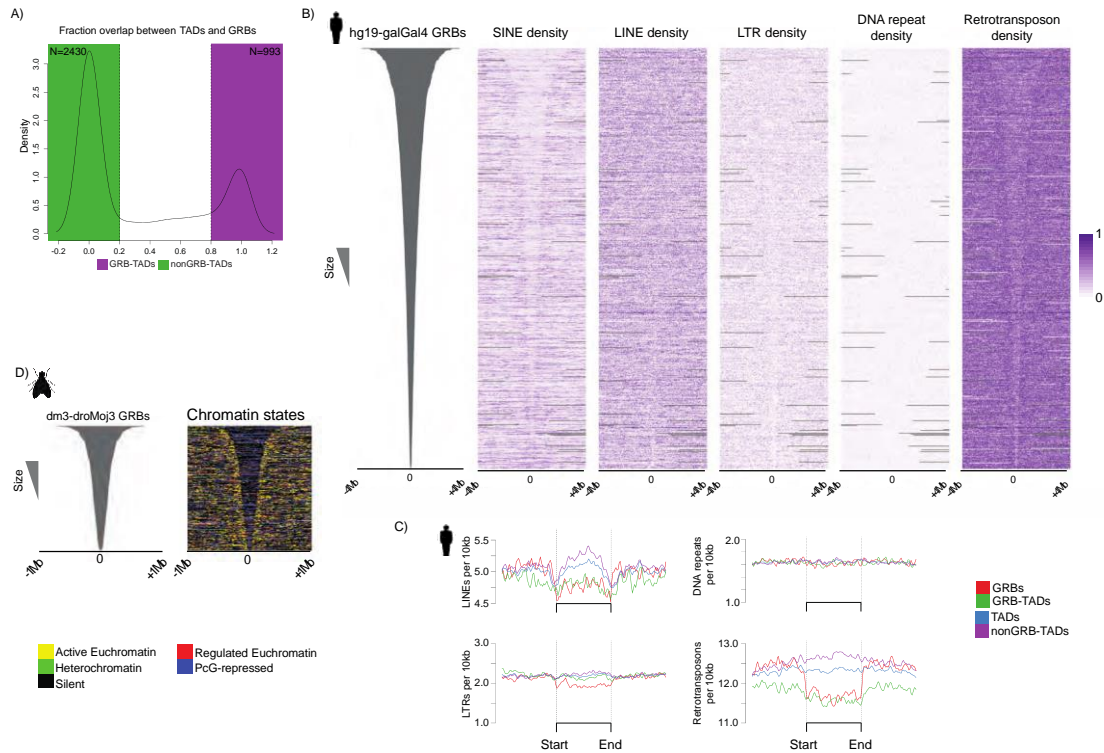

**Supplementary Figure 8: Several sets of features distinguish between TADs associated with extreme non-coding conservation (GRB-TADs) from those without (nonGRB-TADs).** A) Distribution of overlap of hESC HOMER TADs with putative hg19-galGal4 GRBs (70%/50bp). Thresholds for classifying TADs into GRB-TADs and nonGRB-TADs were determined based on the observed bimodality of this distribution. B) Distribution of different classes of retrotransposons in a 8Mb window centred on the midpoint of hg19-galGal4 GRBs. There is a clear depletion of SINEs within GRBs compared to surrounding regions, although there is not a depletion of other classes of retrotransposons within these regions. C) Meta-plots describing the distribution of different retrotransposon classes around the boundaries of hESC HOMER TADs and hg19-galGal4 GRBs. D) Chromatin states in a 2Mb window centred on the midpoint of dm3-droMoj3 GRBs. The vast majority of GRBs are covered primarily with *blue* and *black* chromatin, with a clear depletion in *green* and *yellow* chromatin.

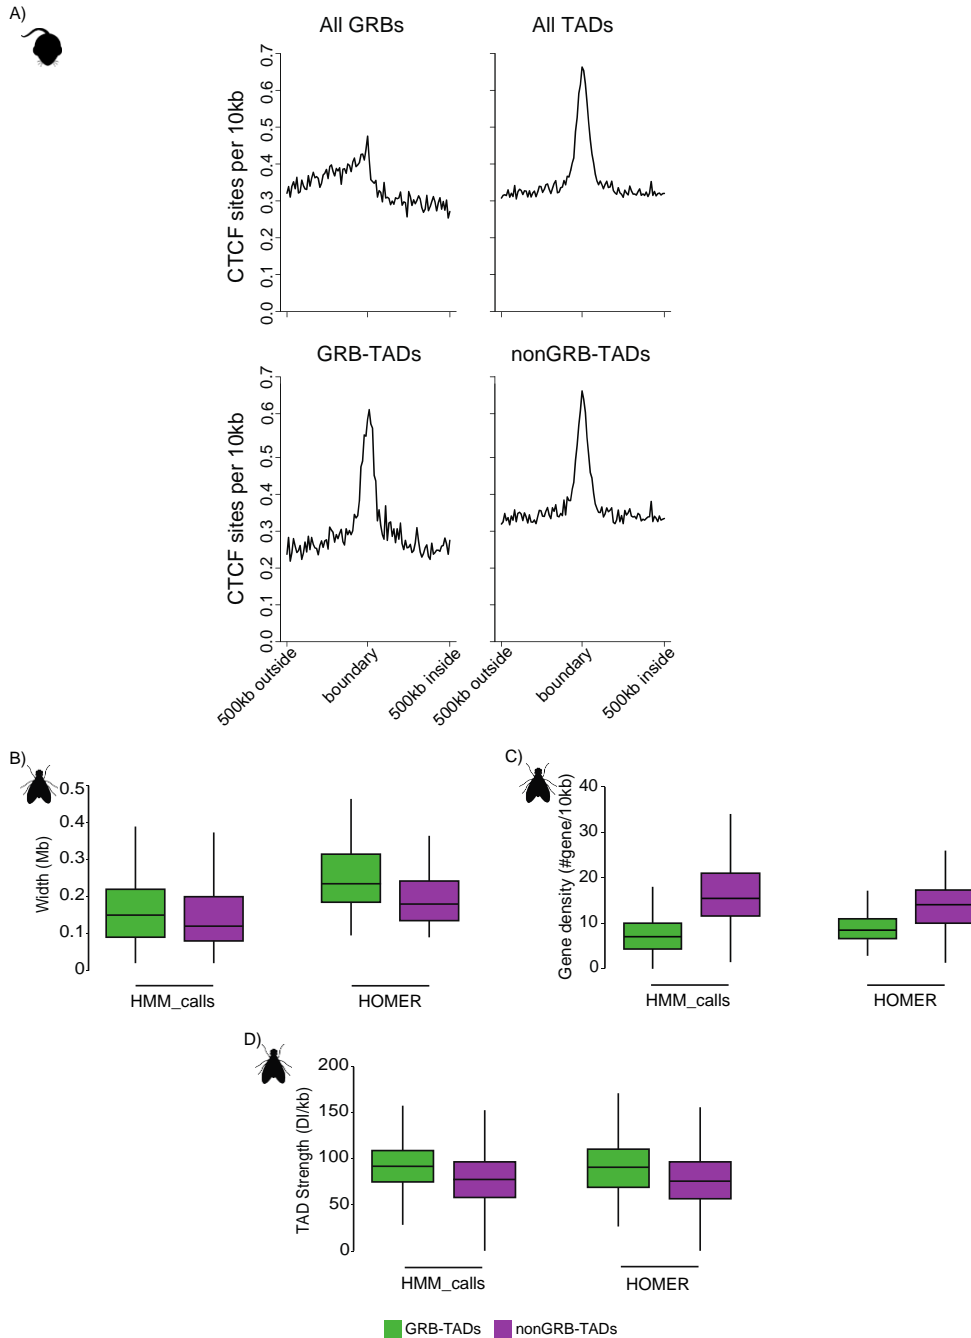

**Supplementary Figure 9: Several sets of features distinguish between TADs associated with extreme non-coding conservation (GRB-TADs) from those without (nonGRB-TADs) in both mammals and flies.** A) CTCF is enriched at GRB and TAD boundaries. CTCF sites per 10kb in a 1Mb window around GRB boundaries, TAD boundaries, and TADs separated into GRB-TADs and nonGRB-TADs (see Methods). B) The sizes of GRB-TADs identified in *Drosophila* whole embryos are significantly longer than nonGRB-TADs identified using either HOMER (median width 235kb vs. 185kb,  $p < 0.001$ ) or HMM\_calls (median width 150kb vs. 120kb,  $p = 0.014$ ). C) *Drosophila* embryo GRB-TADs are associated with lower protein-coding gene density than nonGRB-TADs identified using either HOMER (median #genes 8.50 vs. 14.06  $p < 1e-6$ ) or HMM\_calls (median #genes 7.10 vs. 15.45  $p < 1e-6$ ). D) Distribution of TAD strength shows that *Drosophila* GRB-TADs are significantly stronger than nonGRB-TADs identified using either HOMER (median strength 128.54 vs. 91.41,  $p < 1e-6$ ) or HMM\_calls (median strength 123.08 vs. 72.95,  $p < 1e-6$ ).

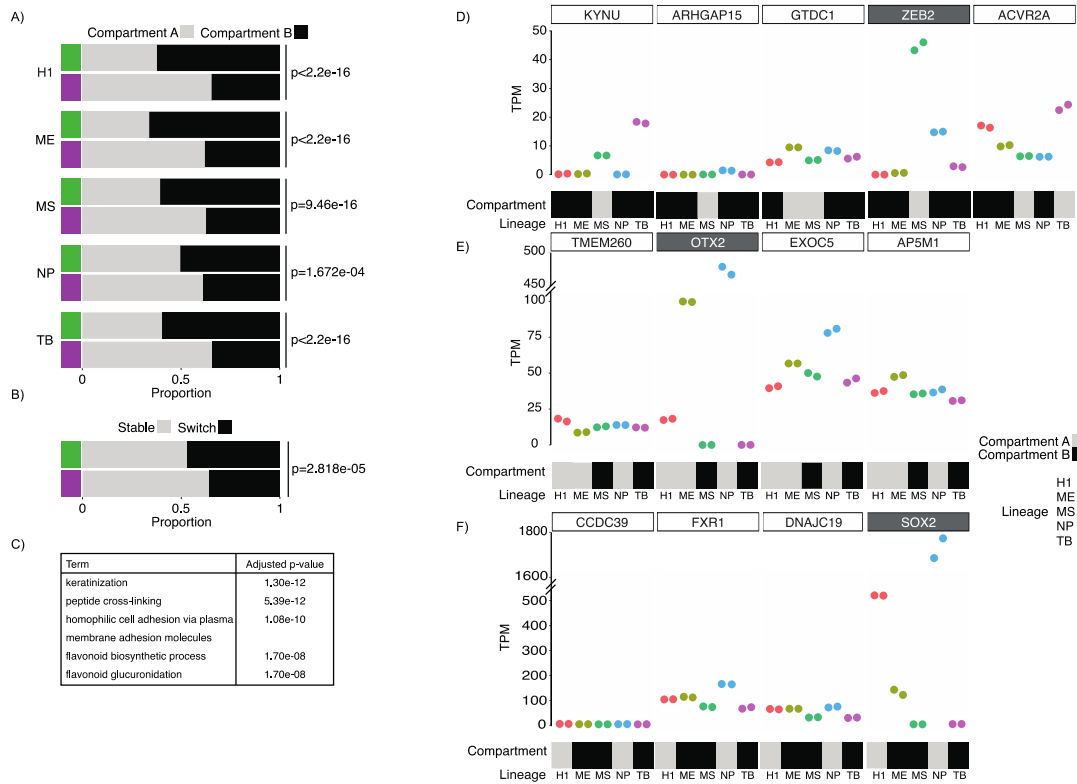

**Supplementary Figure 10: GRB-TADs are associated with compartment B, with changes in compartment between lineages associated with changes in expression of the GRB target gene.** A) GRB-TADs (HMM\_calls) are preferentially associated with Compartment B in all of the lineages investigated. B) GRB-TADs are more likely to switch compartment at least one of the five lineages investigated (i.e. A-B or B-A) than nonGRB-TADs. C) Simplified significant GO Biological process enrichment for genes located within nonGRB-TADs, but which changed compartment in at least one of the five lineages. D) A GRB (chr2:143298358-148669176) contains the developmental regulator *ZEB2* and several bystander genes. The only gene at this locus which shows dramatic upregulation in MS, when the region is now located in Compartment A is *ZEB2*. E) The GRB (chr14:56879402-57783739) containing *OTX2*, a homeobox containing TF, is located in compartment A in ME and NP concordant with an upregulation of this gene in those lineages. Nearby bystander genes do not show any large change in their expression profiles and appear to be unaffected by compartment switching. F) A GRB (chr3:180436332-182390735) contains *SOX2*, a TF important in the maintenance of pluripotency and neurogenesis. The same pattern observed at the *OTX2* and *ZEB2* loci is observed with the location of this region in Compartment A in NP and H1, largely reflecting the upregulation of *SOX2* in those lineages.

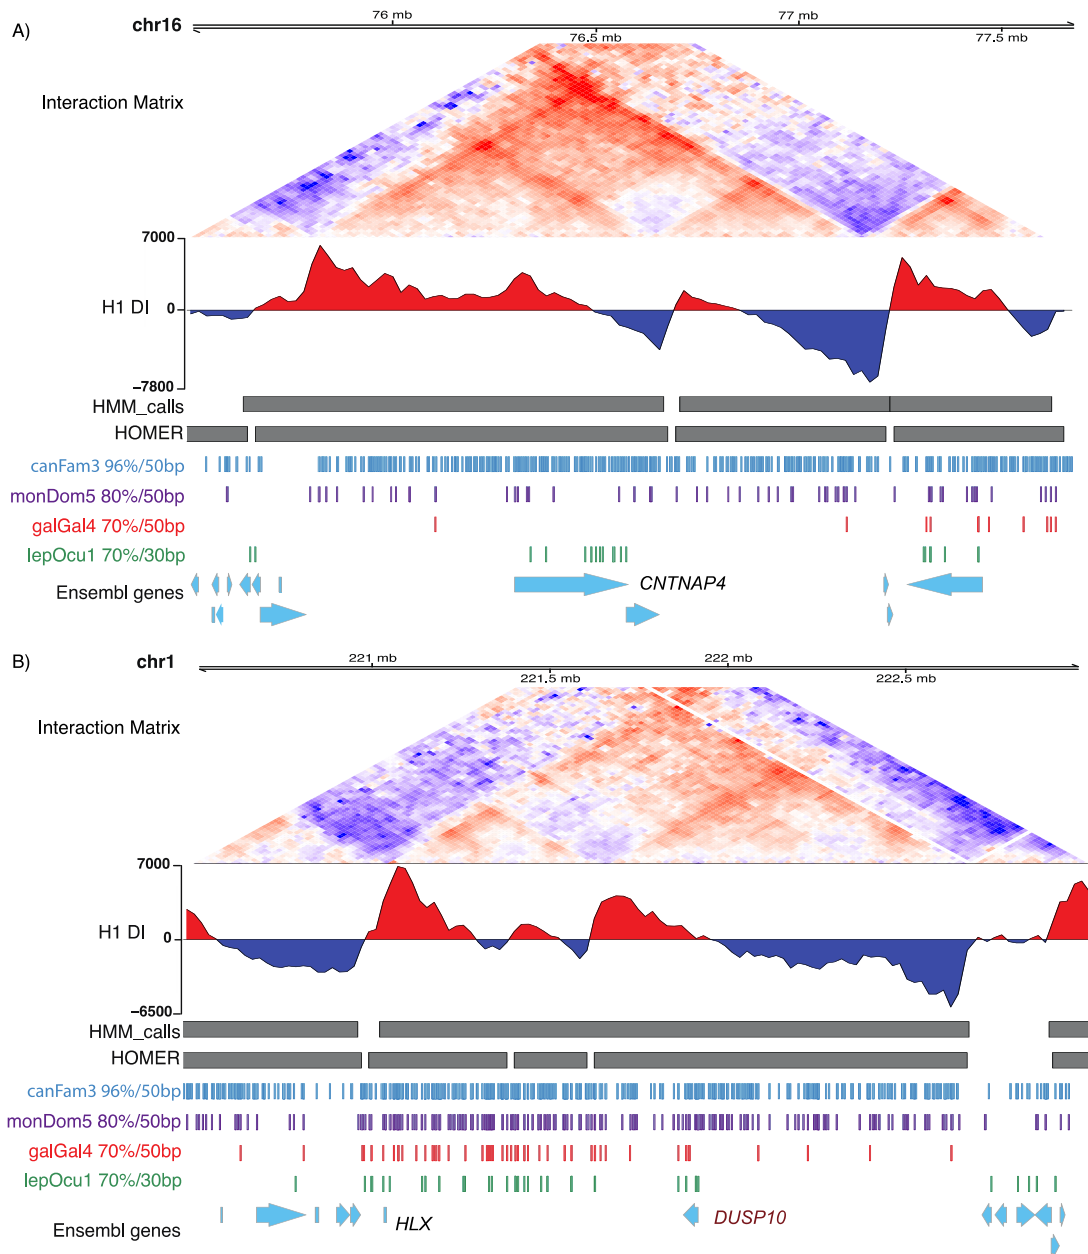

**Supplementary Figure 11: Patterns of non-coding conservation provide insights into *cis*-regulatory evolution at a number of loci.** A) The *CNTNAP4* locus (chr16:75500000-77690000) has a limited number of CNEs identifiable in comparisons between human and spotted gar, but lacks CNEs in comparisons between human and chicken. However, comparisons between human and opossum or dog, identifies a set of CNEs, which are predictive of the topological organisation at this locus. B) A region containing the homeobox *HLX* (chr1:220500000-223000000) shows presence of CNEs in the region from *HLX* to *DUSP10*. Although there is strong conservation of the left boundary of this region, the right boundary of this locus appears to be different dependent on the species involved. CNEs may be recruited in the region to the right of *DUSP10* suggesting potential evolutionary dynamics.

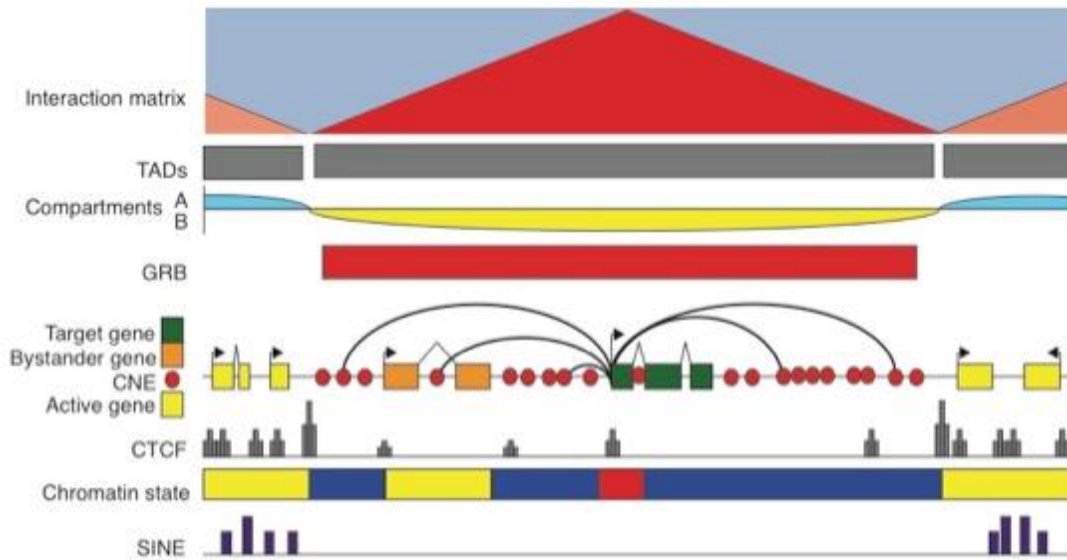

**Supplementary Figure 12: Schematic for relationship of GRB-TADs, GRBs and CNEs.** At loci containing important developmental regulators, the boundaries of TADs can be predicted from the distribution of CNEs. These TADs appear to be both longer and stronger than TADs lacking CNEs and are preferentially associated with compartment B. All of the regulatory elements and CNEs within this GRB-TAD are dedicated to the regulation of the GRB target gene. This regulatory domain is depleted for both CTCF and SINE elements inside it, while exhibiting enrichment for constitutive binding of CTCF at its boundaries.

**Supplementary Table 1 – GRB statistics**

| Genome1 | Genome2 | Percentage Identity | Length | N    | Summary Statistics |             |              |
|---------|---------|---------------------|--------|------|--------------------|-------------|--------------|
|         |         |                     |        |      | Minimum Size       | Median Size | Maximum Size |
| hg19    | monDom5 | 80%                 | 50bp   | 1159 | 17612              | 676245      | 9206749      |
| hg19    | galGal4 | 90%                 | 50bp   | 4965 | 97593              | 1388520     | 8678549      |
| hg19    | galGal4 | 80%                 | 50bp   | 667  | 10049              | 1047838     | 7907716      |
| hg19    | galGal4 | 70%                 | 50bp   | 816  | 10118              | 881448      | 7222385      |
| hg19    | lepOcu1 | 70%                 | 30bp   | 715  | 1606               | 562873      | 3956612      |
| mm9     | galGal4 | 70%                 | 50bp   | 774  | 10380              | 690086.5    | 5697791      |
| dm3     | droMoj3 | 96%                 | 30bp   | 317  | 7878               | 127687      | 714028       |



**Supplementary Table 2 – Correspondence between GRB and TAD boundaries**

| GRB set                | Cell line   | Method  | Median relative distance from GRB start to nearest TAD boundary (bp) | Median relative distance from GRB end to nearest TAD boundary (bp) | Median absolute distance from GRB start to nearest TAD boundary (bp) | Median absolute distance from GRB end to nearest TAD boundary (bp) | # GRBs with both edges 120kb | p-value |
|------------------------|-------------|---------|----------------------------------------------------------------------|--------------------------------------------------------------------|----------------------------------------------------------------------|--------------------------------------------------------------------|------------------------------|---------|
|                        |             |         |                                                                      |                                                                    |                                                                      |                                                                    |                              |         |
| hg19/galGal4(70%/50bp) | H1          | HOMER   | -54214                                                               | 62076                                                              | 112002                                                               | 112895                                                             | 235                          | p<1e-5  |
|                        | H1          | DIXON   | -109246                                                              | 98235                                                              | 183483.5                                                             | 174008                                                             | 129                          | p<1e-5  |
|                        | Mesenchymal | HOMER   | -56984                                                               | 57845.5                                                            | 112716.5                                                             | 106477                                                             | 233                          | p<1e-5  |
|                        | Mesenchymal | DIXON   | -104081                                                              | 111511.5                                                           | 168057.5                                                             | 185671.5                                                           | 126                          | p<1e-5  |
|                        | Mesendoderm | HOMER   | -70351                                                               | 70523                                                              | 124723                                                               | 125357                                                             | 196                          | p<1e-5  |
|                        | Mesendoderm | DIXON   | -154119                                                              | 106745                                                             | 222259                                                               | 184264                                                             | 110                          | p<1e-5  |
|                        | NP          | HOMER   | -66051.5                                                             | 66415.5                                                            | 117730.5                                                             | 118858                                                             | 209                          | p<1e-5  |
|                        | NP          | DIXON   | -167250                                                              | 135056                                                             | 236494                                                               | 228637                                                             | 103                          | p<1e-5  |
|                        | TB          | HOMER   | -63603                                                               | 65680                                                              | 122858.5                                                             | 115187.5                                                           | 198                          | p<1e-5  |
| TB                     | DIXON       | -109598 | 122154                                                               | 183730                                                             | 187024                                                               | 128                                                                | p<1e-5                       |         |
| hg19/monDom5(80%/50bp) | H1          | HOMER   | -54844.5                                                             | 57989.5                                                            | 112511                                                               | 114573.5                                                           | 314                          | p<1e-5  |
|                        | H1          | DIXON   | -112127                                                              | 120208                                                             | 181416                                                               | 185362                                                             | 190                          | p<1e-5  |
|                        | Mesenchymal | HOMER   | -60102                                                               | 53881                                                              | 109767                                                               | 106257                                                             | 329                          | p<1e-5  |
|                        | Mesenchymal | DIXON   | -104835                                                              | 120208                                                             | 169820                                                               | 195725                                                             | 183                          | p<1e-5  |
|                        | Mesendoderm | HOMER   | -54658                                                               | 74262.5                                                            | 120744.5                                                             | 120119.5                                                           | 279                          | p<1e-5  |
|                        | Mesendoderm | DIXON   | -143499                                                              | 131804                                                             | 206497                                                               | 199548                                                             | 168                          | p<1e-5  |
|                        | NP          | HOMER   | -66009                                                               | 54426                                                              | 112018                                                               | 112663                                                             | 306                          | p<1e-5  |
|                        | NP          | DIXON   | -184474.5                                                            | 168087                                                             | 240960                                                               | 233378                                                             | 148                          | p<1e-5  |
|                        | TB          | HOMER   | -61200                                                               | 60638                                                              | 118896                                                               | 118454                                                             | 305                          | p<1e-5  |
| TB                     | DIXON       | -103591 | 134548                                                               | 161497                                                             | 201526                                                               | 189                                                                | p<1e-5                       |         |
| hg19/lepOcu1(70%/30bp) | H1          | HOMER   | -68548                                                               | 56677                                                              | 145198                                                               | 136693                                                             | 141                          | p<1e-5  |
|                        | H1          | DIXON   | -185361                                                              | 163029                                                             | 246625                                                               | 223948                                                             | 65                           | p<1e-5  |
|                        | Mesenchymal | HOMER   | -59418                                                               | 52081                                                              | 138839                                                               | 127798                                                             | 150                          | p<1e-5  |
|                        | Mesenchymal | DIXON   | -166586                                                              | 149047                                                             | 237379                                                               | 219458                                                             | 69                           | p<1e-5  |
|                        | Mesendoderm | HOMER   | -87691                                                               | 80400.5                                                            | 165592.5                                                             | 162916.5                                                           | 113                          | p<1e-5  |
|                        | Mesendoderm | DIXON   | -232507                                                              | 179720.5                                                           | 288766                                                               | 242825.5                                                           | 62                           | p<1e-5  |
|                        | NP          | HOMER   | -59530                                                               | 70135                                                              | 145972                                                               | 146757                                                             | 123                          | p<1e-5  |
|                        | NP          | DIXON   | -275540                                                              | 258653                                                             | 327739.5                                                             | 306696                                                             | 48                           | p<1e-5  |
|                        | TB          | HOMER   | -64126.5                                                             | 63414                                                              | 150838.5                                                             | 141514.5                                                           | 126                          | p<1e-5  |
| TB                     | DIXON       | -180310 | 162106                                                               | 243246                                                             | 233226                                                               | 69                                                                 | p<1e-5                       |         |
| dm3/droMoj3(96%/50bp)  | dEmbryo     | HOMER   | -20095                                                               | 27960.5                                                            | 26668.5                                                              | 33294.5                                                            | 102                          | p<1e-5  |
|                        | dEmbryo     | DIXON   | -20887                                                               | 18617                                                              | 29260                                                                | 29116                                                              | 106                          | p<1e-5  |

**Supplementary Table 3 – TAD statistics**

| CellLine    | Method | N    | hg19-monDom5[90%/50bp) |              | hg19-galGal4[90%/50bp) |              | hg19-galGal4[80%/50bp) |              | hg19-galGal4[70%/50bp) |              | hg19-lepOcu1[70%/30bp) |              |
|-------------|--------|------|------------------------|--------------|------------------------|--------------|------------------------|--------------|------------------------|--------------|------------------------|--------------|
|             |        |      | #GRB-TADS              | #NONGRB-TADS | #GRB-TADS              | #NONGRB-TADS | #GRB-TADS              | #NONGRB-TADS | #GRB-TADS              | #NONGRB-TADS | #GRB-TADS              | #NONGRB-TADS |
| H1          | HOMER  | 4034 | 1144                   | 2025         | 903                    | 2779         | 1015                   | 2521         | 993                    | 2430         | 467                    | 3031         |
| H1          | DIXON  | 2698 | 582                    | 1316         | 482                    | 1847         | 526                    | 1643         | 511                    | 1576         | 207                    | 1969         |
| Mesenchymal | HOMER  | 3463 | 887                    | 1758         | 707                    | 2423         | 796                    | 2185         | 777                    | 2106         | 362                    | 2588         |
| Mesenchymal | DIXON  | 2345 | 455                    | 1132         | 390                    | 1619         | 424                    | 1428         | 407                    | 1366         | 171                    | 1702         |
| Mesendoderm | HOMER  | 4011 | 1125                   | 2012         | 882                    | 2776         | 983                    | 2522         | 966                    | 2421         | 451                    | 3021         |
| Mesendoderm | DIXON  | 2744 | 589                    | 1343         | 492                    | 1886         | 528                    | 1685         | 504                    | 1618         | 212                    | 2013         |
| NP          | HOMER  | 3558 | 1020                   | 1719         | 803                    | 2402         | 889                    | 2152         | 873                    | 2062         | 407                    | 2630         |
| NP          | DIXON  | 1923 | 393                    | 811          | 352                    | 1221         | 371                    | 1051         | 352                    | 1004         | 137                    | 1325         |
| TB          | HOMER  | 3689 | 994                    | 1861         | 790                    | 2570         | 879                    | 2326         | 858                    | 2234         | 403                    | 2759         |
| TB          | DIXON  | 2649 | 577                    | 1282         | 491                    | 1813         | 527                    | 1609         | 502                    | 1541         | 201                    | 1928         |

| CellLine | Method | N    | mm9-galGal4[70%/50bp) |              |
|----------|--------|------|-----------------------|--------------|
|          |        |      | #GRB-TADS             | #NONGRB-TADS |
| mESC     | HOMER  | 3747 | 694                   | 2478         |
| mESC     | DIXON  | 2200 | 311                   | 1352         |
| mCortex  | HOMER  | 3145 | 608                   | 2032         |
| mCortex  | DIXON  | 1519 | 181                   | 849          |

| CellLine | Method | N   | dm3-droMoj3[96%/50bp) |              |
|----------|--------|-----|-----------------------|--------------|
|          |        |     | #GRB-TADS             | #NONGRB-TADS |
| dEmbryo  | HOMER  | 357 | 136                   | 106          |
| dEmbryo  | DIXON  | 489 | 122                   | 211          |

# Supplementary Methods

## Generating the null distribution of GRB-TAD edge distances

The significance of the number of GRBs having both edges within a specified distance of a TAD boundary was calculated by comparing the observed number of GRBs with that observed by randomly shuffling GRBs. A null distribution was created by generating 100000 shuffled regions using BEDtools<sup>16</sup>, excluding centromeric regions, and calculating the number of random regions whose boundaries were within Xkb bins of the nearest TAD boundary. A distance of 120kb was used for all comparisons involving human and 40kb for comparisons involving *Drosophila*.

## Histone modification data

H3K4me1 and H3K27ac ChIP-seq data for human H1, ME, MS, NP and TB cells was obtained from GSE16256<sup>17</sup>, and aligned against hg19 using bowtie<sup>18</sup>. Enriched regions were identified using MACS2<sup>19</sup>, using default parameters. ChIP dataset quality was assessed using CHIPQC<sup>20</sup>, and the dataset with the highest ChIP enrichment was used (identified as the replicate having the maximum RiP (reads in peaks)). In order to prevent promoters marked by H3K27ac from affecting our analyses, H3K27ac signal present within 2.5kb of Ensembl annotated TSSs was removed. The location of significantly enriched regions within 5kb bins was then calculated in an 8Mb window around the midpoint of putative GRBs and visualised.

## Analysis of 4C data

4C data was obtained from GSE31659<sup>7</sup>. Annotation for the tiling array was lifted over from mm8 to mm9. Datasets were normalised and processed using the MRA.TA package at the level of restriction enzyme fragments<sup>21</sup> and p-values combined across replicates using Fisher's method. Those interactions with a p-value < 0.1 were classified as significant interactions. A CNE was classified as interacting with *Hoxd13* or *Hoxd4* if it overlapping a restriction fragment that was involved in an interaction (p-value < 0.1) with either of these two genes.

## RNA-seq analysis

RNA-seq data was obtained from GSE16256<sup>22</sup>, and aligned against Ensembl genes release 75 using Tophat2<sup>23</sup>. Aligned reads were counted using htseq<sup>24</sup>. Differential expression analysis was performed using DESeq2<sup>25</sup>.

# Supplementary References

1. Kikuta, H. *et al.* Genomic regulatory blocks encompass multiple neighboring genes and maintain conserved synteny in vertebrates. *Genome Res.* **17**, 545–555 (2007).
2. Engström, P. G., Ho Sui, S. J., Drivenes, O., Becker, T. S. & Lenhard, B. Genomic regulatory blocks underlie extensive microsynteny conservation in insects. *Genome Res.* **17**, 1898–1908 (2007).
3. Pennacchio, L. A. *et al.* In vivo enhancer analysis of human conserved non-coding sequences. *Nature* **444**, 499–502 (2006).
4. Royo, J. L. *et al.* Dissecting the Transcriptional Regulatory Properties of Human Chromosome 16 Highly Conserved Non-Coding Regions. *PLoS ONE* **6**, e24824 (2011).
5. Navratilova, P. *et al.* Systematic human/zebrafish comparative identification of cis-regulatory activity around vertebrate developmental transcription factor genes. *Dev. Biol.* **327**, 526–540 (2009).
6. Morey, C., Da Silva, N. R., Perry, P. & Bickmore, W. A. Nuclear reorganisation and chromatin decondensation are conserved, but distinct, mechanisms linked to Hox gene activation. *Development* **134**, 909–919 (2007).
7. Montavon, T. *et al.* A regulatory archipelago controls Hox genes transcription in digits. *Cell* **147**, 1132–1145 (2011).
8. Noordermeer, D. *et al.* The dynamic architecture of Hox gene clusters. *Science* **334**, 222–225 (2011).
9. Williamson, I. *et al.* Anterior-posterior differences in HoxD chromatin topology in limb development. *Development* **139**, 3157–3167 (2012).
10. Irimia, M. *et al.* Extensive conservation of ancient microsynteny across metazoans due to cis-regulatory constraints. *Genome Res.* **22**, 2356–2367 (2012).
11. Lee, A. P., Koh, E. G. L., Tay, A., Brenner, S. & Venkatesh, B. Highly conserved syntenic blocks at the vertebrate Hox loci and conserved regulatory elements within and outside Hox gene clusters. **103**, 6994–6999 (2006).
12. Ghavi-Helm, Y. *et al.* Enhancer loops appear stable during development and are associated with paused polymerase. *Nature* **512**, 96–100 (2014).
13. Cameron, R. A., Samanta, M., Yuan, A., He, D. & Davidson, E. SpBase: the sea urchin genome database and web site. *Nucleic Acids Res* **37**, D750–4 (2009).
14. Gómez-Marín, C. *et al.* Evolutionary comparison reveals that diverging CTCF sites are signatures of ancestral topological associating domains borders. **112**, 7542–7547 (2015).
15. Harmston, N., Ing-Simmons, E., Perry, M., Baresic, A. & Lenhard, B. GenomicInteractions: An R/Bioconductor package for manipulating and investigating chromatin interaction data. *BMC Genomics* **16**, 963 (2015).
16. Quinlan, A. R. & Hall, I. M. BEDTools: a flexible suite of utilities for comparing genomic features. *Bioinformatics* **26**, 841–842 (2010).
17. Roadmap Epigenomics Consortium *et al.* Integrative analysis of 111 reference human epigenomes. *Nature* **518**, 317–330 (2015).
18. Langmead, B., Trapnell, C., Pop, M. & Salzberg, S. L. Ultrafast and memory-efficient alignment of short DNA sequences to the human genome. *Genome Biol.* **10**, R25 (2009).

19. Zhang, Y. *et al.* Model-based analysis of ChIP-Seq (MACS). *Genome Biol.* **9**, R137 (2008).
20. Carroll, T. S., Liang, Z., Salama, R., Stark, R. & de Santiago, I. Impact of artifact removal on ChIP quality metrics in ChIP-seq and ChIP-exo data. *Front Genet* **5**, 75 (2014).
21. Leblanc, B., Comet, I., Bantignies, F. & Cavalli, G. Chromosome Conformation Capture on Chip (4C): Data Processing. *Methods Mol. Biol.* **1480**, 243–261 (2016).
22. Xie, W. *et al.* Epigenomic analysis of multilineage differentiation of human embryonic stem cells. *Cell* **153**, 1134–1148 (2013).
23. Kim, D. *et al.* TopHat2: accurate alignment of transcriptomes in the presence of insertions, deletions and gene fusions. *Genome Biol.* **14**, (2013).
24. Anders, S., Pyl, P. T. & Huber, W. HTSeq--a Python framework to work with high-throughput sequencing data. *Bioinformatics* **31**, 166–169 (2015).
25. Love, M. I., Huber, W. & Anders, S. Moderated estimation of fold change and dispersion for RNA-seq data with DESeq2. *Genome Biol.* **15**, 550 (2014).
